# Supplementary material for: Epigenetic regulation of OAS2 shows disease-specific DNA methylation profiles at individual CpG sites
Source: PubMed Central journal article supplement (PMC5004144; doi:10.1038/srep32579), 2016-08-30
Supplement: srep32579-s1.pdf [file srep32579-s1.pdf]

# Epigenetic regulation of *OAS2* shows disease-specific DNA methylation profiles at individual CpG sites

Xiaolian Gu, Linda Boldrup, Philip J. Coates, Robin Fahraeus, Elisabet Nylander, Christos

Loizou, Katarina Olofsson, Lena Norberg-Spaak, Ola Gärskog, Karin Nylander

Supplementary information

Table S1 Clinical data on patients with squamous cell carcinoma of the head and neck (SCCHN)

Patients with Tongue SCC

| No. | Patient ID | Sex    | Age at diagnosis | Localisation* | TNM     |
|-----|------------|--------|------------------|---------------|---------|
| 1   | 20         | Male   | 61               | 3             | T1N0M0  |
| 2   | 35         | Female | 24               | 2             | T2N0M0  |
| 3   | 49         | Female | 52               | 3             | T4N2cM0 |
| 4   | 76         | Male   | 59               | 1             | T4aN0M0 |
| 5   | 98         | Male   | 31               | 3             | T2N0M0  |
| 6   | 105        | Male   | 64               | 2             | T1N0M0  |
| 7   | 111        | Female | 31               | 2             | T1N0M0  |
| 8   | 119        | Male   | 67               | 2             | T2N0M0  |
| 9   | 124        | Male   | 55               | 3             | T4N2bM0 |
| 10  | 131        | Female | 74               | 2             | T2N0M0  |
| 11  | 137        | Female | 71               | 2             | T2N0M0  |
| 12  | 138        | Male   | 50               | 2             | T2N1M0  |

Patients with Tonsillar SCC

| No. | Patient ID | Sex    | Age at diagnosis | TNM      |
|-----|------------|--------|------------------|----------|
| 1   | 60         | Male   | 56               | T2N2cM0  |
| 2   | 80         | Male   | 50               | T4aN2cM0 |
| 3   | 93         | Male   | 70               | T2N2bM0  |
| 4   | 94         | Male   | 72               | T4N2bM0  |
| 5   | 95         | Male   | 54               | T3N0M0   |
| 6   | 113        | Male   | 56               | T2N2bM0  |
| 7   | 116        | Female | 75               | T4aN2bM0 |
| 8   | 117        | Female | 58               | T2N0M0   |
| 9   | 118        | Male   | 53               | T2N0M0   |
| 10  | 130        | Female | 49               | T3N2bM0  |
| 11  | 142        | Male   | 67               | T4N2bM0  |

\* 1= tongue; 2=border of tongue; 3=overgrowth into floor of mouth

Table S2 Clinical data on patients with ready-to-use DNA samples for this project

Patients with psoriasis

| No. | Gender | Age | Psoriasis since | Biopsy site          | Localisation of lesions           | Others              |
|-----|--------|-----|-----------------|----------------------|-----------------------------------|---------------------|
| 1   | Male   | 40  | > 20 y          | Buttocks, lower back | Whole body                        |                     |
| 2   | Female | 73  | unknown         | Arms                 | Arms, back, soles, scalp          |                     |
| 3   | Male   | 59  | > 20 y          | Thighs               | Legs, buttocks, left elbow, hands | Hypertonia          |
| 4   | Male   | 67  | < 1 y           | Buttocks, thigh      | Elbows, legs, scalp, buttocks     |                     |
| 5   | Male   | 26  | ~1 y            | Buttocks             | Legs, arms, scalp, face, buttocks |                     |
| 6   | Male   | 17  | > 10 y          | Buttocks             | Whole body, scalp                 |                     |
| 7   | Female | 47  | > 10 y          | buttocks             | Whole body                        | Psoriatic arthritis |
| 8   | Male   | 43  | > 10 y          | buttocks             | Lower legs, arms, trunk           |                     |
| 9   | Female | 46  | > 10 y          | legs                 | Legs, elbows, hands               | Psoriatic arthritis |
| 10  | Female | 74  | 2 y             | buttocks             | Whole body                        | Hypertonia          |
| 11  | Female | 33  | > 10 y          | Buttocks             | Whole body                        |                     |
| 12  | Female | 28  | > 10y           | Buttocks             | Whole body                        |                     |

Patients with tonsillar SCC

| No. | Specimen number | Year diagnosis | % tumor | p16 quickscore | HPV* | Gender | Age diagnosis |
|-----|-----------------|----------------|---------|----------------|------|--------|---------------|
| 1   | 1               | 2012           | 25      | 6              | 1    | Female | 67            |
| 2   | 2               | 2012           | 70      | 12             | 1    | Male   | 64            |
| 3   | 3               | 2012           | 70      | 12             | 1    | Male   | 53            |
| 4   | 4               | 2012           | 50      | 12             | 1    | Male   | 51            |
| 5   | 6               | 2011           | 80      | 12             | 1    | Male   | 70            |
| 6   | 8               | 2012           | 40      | 12             | 1    | Male   | 53            |
| 7   | 9               | 2011           | 60      | 12             | 1    | Male   | 55            |
| 8   | 10              | 2011           | 30      | 12             | 1    | Male   | 54            |
| 9   | 12              | 2011           | 30      | 12             | 1    | Male   | 45            |
| 10  | 13              | 2011           | 70      | 12             | 1    | Female | 65            |
| 11  | 31              | 2007           | 60      | 12             | 1    | Male   | 64            |
| 12  | 35              | 2005           | 80      | 12             | 1    | Male   | 62            |
| 13  | 36              | 2005           | 80      | 12             | 1    | Male   | 47            |
| 14  | 39              | 2003           | 80      | 12             | 1    | Male   | 57            |
| 15  | 41              | 2002           | 80      | 12             | 1    | Female | 64            |
| 16  | 43              | 2001           | 70      | 12             | 1    | Female | 46            |
| 17  | 59              | 2008           | 80      | 12             | 1    | Female | 53            |
| 18  | 28              | 2007           | 60      | 0              | 0    | Male   | 51            |
| 19  | 37              | 2005           | 90      | 2              | 0    | Female | 64            |
| 20  | 42              | 2001           | 50      | 0              | 0    | Female | 53            |
| 21  | 50              | 2004           | 60      | 2              | 0    | Female | 54            |
| 22  | 56              | 2004           | 40      | 4              | 0    | Male   | 73            |
| 23  | 66              | 2009           | 60      | 12             | 0    | Male   | 63            |

\* 0, HPV-negative; 1, HPV-positive

Table S3 Thirteen probes for *OAS2* in the Illumina 450K methylation array

|   | ProbeID           | Gene.1      | CHR       | MAPINFO          | Feature.1      | Methylation beta value_Control | Methylation beta value_Psoriasis | Delta beta   | adj.PVal        |
|---|-------------------|-------------|-----------|------------------|----------------|--------------------------------|----------------------------------|--------------|-----------------|
| * | <b>cg19371652</b> | <b>OAS2</b> | <b>12</b> | <b>113415883</b> | <b>TSS1500</b> | <b>0,79</b>                    | <b>0,49</b>                      | <b>-0,30</b> | <b>1,63E-05</b> |
| * | cg11601443        | OAS2        | 12        | 113415930        | TSS1500        | 0,93                           | 0,88                             | -0,05        | 2,44E-04        |
| * | <b>cg12560128</b> | <b>OAS2</b> | <b>12</b> | <b>113416061</b> | <b>TSS1500</b> | <b>0,31</b>                    | <b>0,13</b>                      | <b>-0,18</b> | <b>2,39E-03</b> |
|   | cg27147785        | OAS2        | 12        | 113416145        | TSS200         | 0,17                           | 0,10                             | -0,07        | 1,98E-03        |
|   | cg11318133        | OAS2        | 12        | 113416268        | TSS200         | 0,08                           | 0,06                             | -0,02        | 3,33E-02        |
|   | cg00175901        | OAS2        | 12        | 113416290        | 1stExon        | 0,09                           | 0,09                             | 0,00         | 8,66E-01        |
|   | cg00085448        | OAS2        | 12        | 113416442        | 1stExon        | 0,11                           | 0,08                             | -0,03        | 4,78E-02        |
| * | <b>cg20870559</b> | <b>OAS2</b> | <b>12</b> | <b>113416518</b> | <b>1stExon</b> | <b>0,33</b>                    | <b>0,17</b>                      | <b>-0,16</b> | <b>4,21E-04</b> |
|   | cg16399664        | OAS2        | 12        | 113417284        | Body           | 0,10                           | 0,05                             | -0,04        | 2,54E-04        |
|   | cg06255132        | OAS2        | 12        | 113426510        | Body           | 0,88                           | 0,91                             | 0,03         | 1,11E-02        |
|   | cg12247536        | OAS2        | 12        | 113428107        | Body           | 0,87                           | 0,90                             | 0,03         | 4,53E-03        |
|   | cg07253769        | OAS2        | 12        | 113447342        | 3'UTR          | 0,32                           | 0,34                             | 0,02         | 6,72E-01        |
|   | cg03240232        | OAS2        | 12        | 113448327        | 3'UTR          | 0,91                           | 0,89                             | -0,02        | 4,14E-03        |

\*Indicates pyrosequencing covered CpG sites in this study

Three array-identified hypomethylation CpG sites in psoriasis compared to healthy controls were marked in bold

Table S4 Information of four PyroMark CpG assays

| PyroMark CpG assay  | Pyrosequencing CpG site ID | Corresponding 450K probe ID | Amplicon length | Biotin modification on | Sequenced strand |
|---------------------|----------------------------|-----------------------------|-----------------|------------------------|------------------|
| Hs_CG19371652_02_PM | 1                          | cg19371652                  | 217             | Reverse primer         | sense            |
| Hs_CG11601443_03_PM | 2                          | cg11601443                  | 217             | Reverse primer         | sense            |
|                     | 3                          |                             |                 |                        |                  |
|                     | 4                          |                             |                 |                        |                  |
| Hs_CG12560128_04_PM | 5                          |                             | 222             | Reverse primer         | sense            |
|                     | 6                          | cg12560128                  |                 |                        |                  |
| Hs_CG20870559_04_PM | 7                          |                             | 249             | Reverse primer         | sense            |
|                     | 8                          |                             |                 |                        |                  |
|                     | 9                          | cg20870559                  |                 |                        |                  |
|                     | 10                         |                             |                 |                        |                  |
|                     | 11                         |                             |                 |                        |                  |

Table S5 Correlation between results of 450K array and pyrosequencing

| <b>Correlation</b> | <b>450K Probe ID</b> | <b>Pyrosequencing ID</b> | <b>Spearman's rho</b> | <b>N</b> | <b>Sig. (2-tailed)</b> |
|--------------------|----------------------|--------------------------|-----------------------|----------|------------------------|
| 1                  | array_cg19371652     | CpG1                     | 0.963                 | 24       | 0.000                  |
| 2                  | array_cg11601443     | CpG2                     | 0.792                 | 24       | 0.000                  |
| 3                  | array_cg12560128     | CpG6                     | 0.843                 | 24       | 0.000                  |
| 4                  | array_cg20870559     | CpG9                     | 0.759                 | 24       | 0.000                  |

Table S6 Correlation between OAS2 DNA methylation and gene expression

| Correlations in psoriasis and controls (n=24)                 |                         |         |         |         |         |         |         |         |         |        |         |         |
|---------------------------------------------------------------|-------------------------|---------|---------|---------|---------|---------|---------|---------|---------|--------|---------|---------|
|                                                               |                         | CpG1    | CpG2    | CpG3    | CpG4    | CpG5    | CpG6    | CpG7    | CpG8    | CpG9   | CpG10   | CpG11   |
| Spearman's rho                                                | Correlation Coefficient | -.845** | -.683** | -.767** | -.712** | -.614** | -.622** | -.656** | -.675** | -.505* | -.620** | -.582** |
|                                                               | Sig. (2-tailed)         | .000    | .000    | .000    | .000    | .001    | .001    | .001    | .000    | .012   | .001    | .003    |
| ** . Correlation is significant at the 0.01 level (2-tailed). |                         |         |         |         |         |         |         |         |         |        |         |         |
| * . Correlation is significant at the 0.05 level (2-tailed).  |                         |         |         |         |         |         |         |         |         |        |         |         |

| Correlations in Tongue SCC and tumor free tissues (n=24)      |                         |       |         |         |      |       |      |       |       |      |       |       |
|---------------------------------------------------------------|-------------------------|-------|---------|---------|------|-------|------|-------|-------|------|-------|-------|
|                                                               |                         | CpG1  | CpG2    | CpG3    | CpG4 | CpG5  | CpG6 | CpG7  | CpG8  | CpG9 | CpG10 | CpG11 |
| Spearman's rho                                                | Correlation Coefficient | -.195 | -.738** | -.769** | .099 | -.198 | .094 | -.150 | -.003 | .046 | -.125 | -.086 |
|                                                               | Sig. (2-tailed)         | .362  | .000    | .000    | .645 | .353  | .662 | .484  | .990  | .830 | .562  | .689  |
| ** . Correlation is significant at the 0.01 level (2-tailed). |                         |       |         |         |      |       |      |       |       |      |       |       |

| Correlations in Tonsillar SCC and tumor-free tissues (n=22)   |                         |         |       |       |        |        |        |         |       |       |       |       |
|---------------------------------------------------------------|-------------------------|---------|-------|-------|--------|--------|--------|---------|-------|-------|-------|-------|
|                                                               |                         | CpG1    | CpG2  | CpG3  | CpG4   | CpG5   | CpG6   | CpG7    | CpG8  | CpG9  | CpG10 | CpG11 |
| Spearman's rho                                                | Correlation Coefficient | -.608** | -.285 | -.307 | -.447* | -.472* | -.471* | -.568** | -.394 | -.418 | -.322 | -.292 |
|                                                               | Sig. (2-tailed)         | .003    | .198  | .164  | .037   | .027   | .027   | .006    | .070  | .053  | .144  | .188  |
|                                                               | N                       | 22      | 22    | 22    | 22     | 22     | 22     | 22      | 22    | 22    | 22    | 22    |
| ** . Correlation is significant at the 0.01 level (2-tailed). |                         |         |       |       |        |        |        |         |       |       |       |       |
| * . Correlation is significant at the 0.05 level (2-tailed).  |                         |         |       |       |        |        |        |         |       |       |       |       |

Table S7 Level of variability in OAS2 DNA methylation across normal reference human tissues/cells

| 450K array probe ID | Pyrosequencing ID | Position_chr12_hg19 | All tissues/cells |                |        | Adult tissues/cells |                |        |
|---------------------|-------------------|---------------------|-------------------|----------------|--------|---------------------|----------------|--------|
|                     |                   |                     | Mean              | Std. Deviation | CV*    | Mean                | Std. Deviation | CV*    |
|                     |                   | 113415459           | 0.72              | 0.22           | 29.98  | 0.60                | 0.24           | 40.52  |
|                     |                   | 113415548           | 0.84              | 0.19           | 22.24  | 0.74                | 0.22           | 29.97  |
|                     |                   | 113415571           | 0.71              | 0.22           | 31.41  | 0.57                | 0.21           | 37.29  |
|                     |                   | 113415579           | 0.72              | 0.23           | 31.67  | 0.57                | 0.22           | 39.05  |
|                     |                   | 113415628           | 0.76              | 0.18           | 23.88  | 0.65                | 0.19           | 29.10  |
|                     |                   | 113415639           | 0.57              | 0.24           | 41.86  | 0.42                | 0.16           | 38.36  |
|                     |                   | 113415754           | 0.74              | 0.20           | 27.19  | 0.72                | 0.13           | 18.35  |
|                     |                   | 113415829           | 0.89              | 0.08           | 8.81   | 0.85                | 0.09           | 10.48  |
| cg19371652          | 1                 | 113415883           | 0.67              | 0.26           | 38.87  | 0.47                | 0.22           | 46.45  |
| cg11601443          | 2                 | 113415930           | 0.89              | 0.09           | 9.82   | 0.84                | 0.08           | 9.21   |
|                     | 3                 | 113415932           | 0.88              | 0.10           | 11.43  | 0.81                | 0.09           | 11.36  |
|                     | 4                 | 113415945           | 0.76              | 0.20           | 25.53  | 0.62                | 0.18           | 28.56  |
|                     | 5                 | 113416055           | 0.50              | 0.33           | 66.84  | 0.23                | 0.20           | 86.95  |
| cg12560128          | 6                 | 113416061           | 0.51              | 0.34           | 67.46  | 0.24                | 0.21           | 85.53  |
|                     |                   | 113416145           | 0.40              | 0.32           | 81.31  | 0.14                | 0.15           | 104.83 |
|                     |                   | 113416190           | 0.25              | 0.29           | 116.90 | 0.03                | 0.05           | 155.12 |
|                     |                   | 113416268           | 0.26              | 0.30           | 114.88 | 0.05                | 0.06           | 131.38 |
|                     |                   | 113416290           | 0.29              | 0.30           | 102.98 | 0.07                | 0.10           | 136.32 |
|                     |                   | 113416395           | 0.25              | 0.31           | 124.71 | 0.05                | 0.06           | 120.44 |
|                     |                   | 113416442           | 0.33              | 0.32           | 95.72  | 0.11                | 0.10           | 96.67  |
|                     | 7                 | 113416494           | 0.45              | 0.36           | 79.85  | 0.17                | 0.15           | 85.39  |
|                     | 8                 | 113416515           | 0.52              | 0.35           | 68.57  | 0.24                | 0.20           | 84.01  |
| cg20870559          | 9                 | 113416518           | 0.43              | 0.35           | 81.99  | 0.15                | 0.13           | 88.84  |
|                     | 10                | 113416542           | 0.32              | 0.33           | 102.99 | 0.08                | 0.08           | 98.43  |
|                     | 11                | 113416557           | 0.48              | 0.36           | 75.21  | 0.19                | 0.16           | 84.24  |

\*CV, coefficient of variation



>hg19\_refGene\_NM\_002535\_0 range=chr12:113415774-113416273 5'pad=0 3'pad=0 strand=+ repeatMasking=none

tccctggccactgagaacagggggaaagggacagagcctcaaagatgacctgtg**cg**ccccctgcttctaagcactttgcaggtattatttaatcatcaag

ctaataccta**cg**19371652 agagagctgccattttccccagcttacagatgggggaattgagg**cgcg**11601443 aagagggcagg**cg**4 atgtgctcaaggacagacatctagcag

gtatgaagccctcacaatggggttctagaggctgtttagttaacctcaagttttggggagcccctgaagggctggtcacca**cg**5 ctgcb**cg**12560128 ggggacagggaa

Agcctctgagcttgagtcagttttggtttccctgctggggtgcaggagtcagtaaaccttgctgcaagggg**cg**27147785 ggggaagagcatttgagcttaagttagt

tttggtttccctgccc**cg**gatgcaggagttggtaaactcactgcaaggggcagggcagagcctctgagcttaagttagttttgtttccctgtcc**cg**11318133 gata

>hg19\_refGene\_NM\_002535\_1 range=chr12:113416274-113416590 5'pad=0 3'pad=0 strand=+ repeatMasking=none

CAAGAGTTGGTAAGCT**CG**00175901 CTGCAGTGGGTGGAGAGAGGCCTCTAGACTTCAGTTTCAGTTTCCTGGCTCTGGGCAGCAGCAAGAATTCCTCTGCCTCCCA

TCCTACCATTCACTGTCTTGCC**CG**GCAGCCAGCTGAGAGCA**ATG**GGAAATGGGGAGTCCCAGCTGTCCT**CG**00085448 GTGCCTGCTCAGAAGCTGGGTTGGTTTATC

CAGGAATACCTGAAGCCCTA**CG**7 AAGAATGTCAGACACTGAT**CGA**8 **CG**9 AGATGGTGAACACCATCTGTGA**CG**10 TCCTGCAGGAACC**CG**11 AACAGTTCCCCCTGG

TGCAGGGAGTGGCCATA

**Figure S1. Genomic sequence of OAS2 (500 bp upstream and the 1st exon).** Location of 11 CpG sites covered by four PyroMark CpG assays in pyrosequencing are shown. All CpG sites in this region were marked in bold. Underlined CpG sites indicate targeted by HumanMethylation450K array, corresponding 450K probe ID in the array were also shown. Eleven CpG sites covered by four PyroMark CpG assays were highlighted in red and numbered 1 to 11.

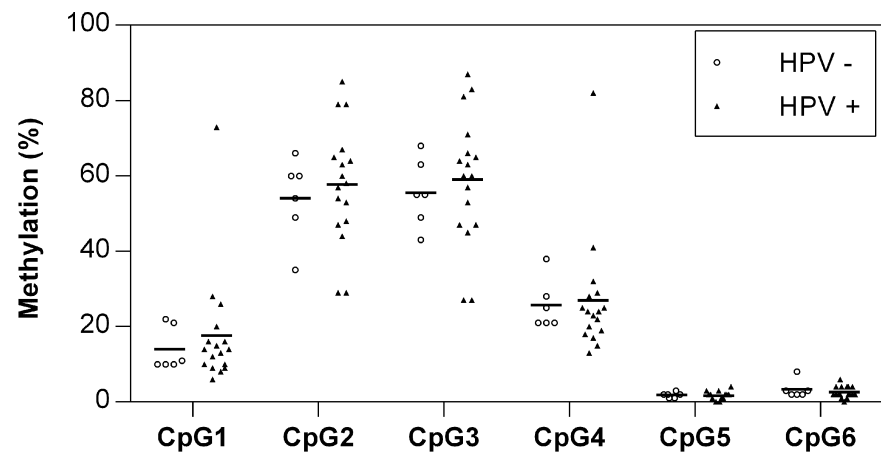

**Figure S2. Comparing OAS2 DNA Methylation levels between HPV-positive and HPV-negative tonsillar SCC.** Methylation levels at CpG1 to CpG6 were measured in 6 HPV-negative (HPV-) and 17 HPV-positive (HPV+) tonsillar SCC. No significant difference in DNA methylation levels between the two patient groups were found.

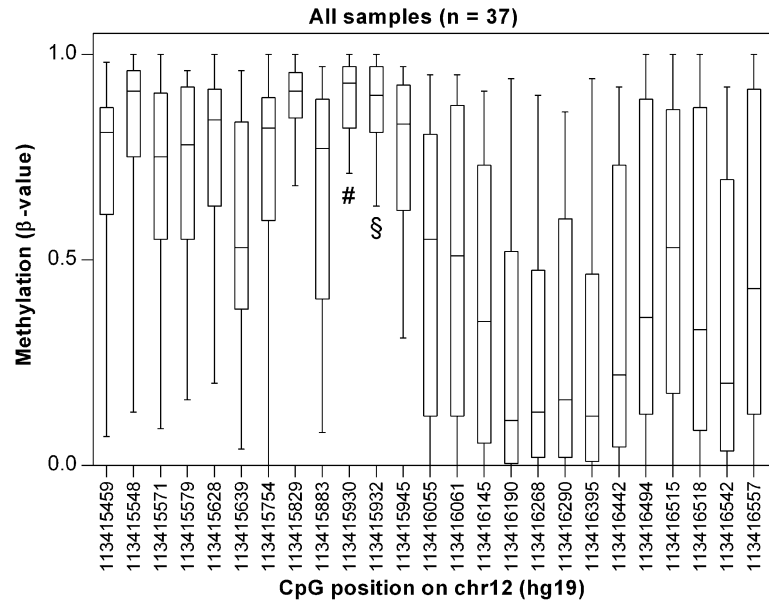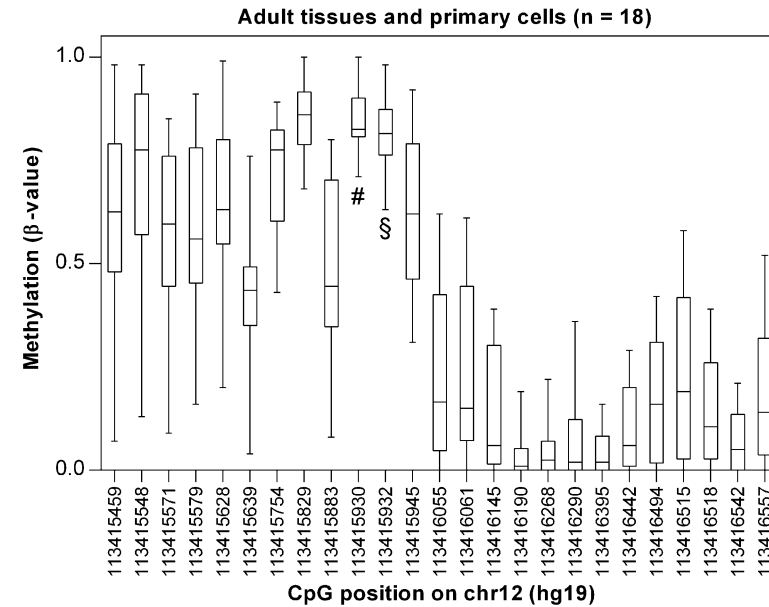

**Figure S3. Methylation status in the promoter region of *OAS2* across different reference tissues/cells.** *OAS2* DNA methylation levels in the proximal promoter region was obtained from 37 reference methylomes produced by Epigenome Roadmap project. Box-plots of methylation levels across different tissues and cells for each CpG site were shown. CpG sites were ordered by genomic position. Methylation level at each site was presented for all 37 reference tissues/cells or only for 18 adult tissues/cells. Box-plots marked with # and § correspond to CpG2 and CpG3 respectively in our pyrosequencing analysis.

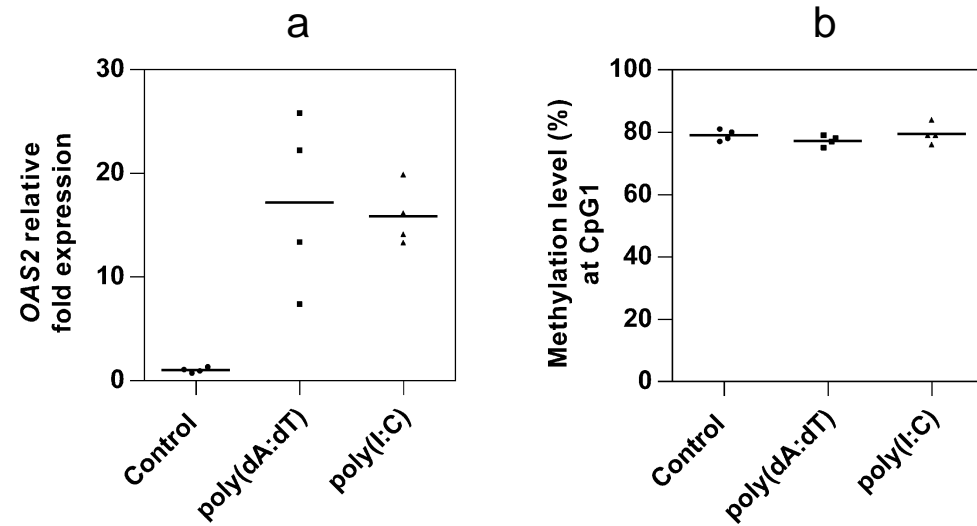

**Figure S4. Upregulation of OAS2 in HEKa cells was not accompanied with change of DNA methylation.** (a) Expression of OAS2 was upregulated upon poly(dA:dT) or poly(I:C) stimulation. Gene expression values from two independent experiments are shown. (b) Methylation status of OAS2 in primary HEKa cells were measured and found to be similar to those of normal epidermis. Upon poly(dA:dT) or poly(I:C) triggers, no change in DNA methylation was seen. OAS2 methylation levels at CpG1 are shown.
